# Supplementary material for: Transcriptome and Metabolome Analyses of Glucosinolates in Two Broccoli Cultivars Following Jasmonate Treatment for the Induction of Glucosinolate Defense to Trichoplusia ni (Hübner)
Source: PubMed Central journal article supplement (PMC4964508; doi:10.3390/ijms17071135), 2016-07-15
Supplement: ijms-17-01135-s001.pdf [file ijms-17-01135-s001.pdf]

# Supplementary Materials: Transcriptome and Metabolome Analyses of Glucosinolates in Two Broccoli Cultivars Following Jasmonate Treatment for the Induction of Glucosinolate Defense to *Trichoplusia ni* (Hübner)

Kang-Mo Ku, Talon M. Becker and John A. Juvik

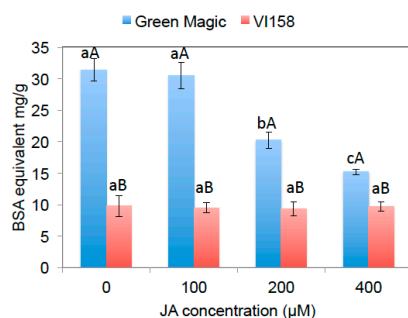

**Figure S1.** Crude protein estimates reported as bovine serum albumin (BSA) equivalents (mg/g DW). Different lowercase letters indicate differences between treatments within a variety and uppercase letters indicate differences between accessions within a treatment according to Fisher’s LSD tests ( $p = 0.05$ ).

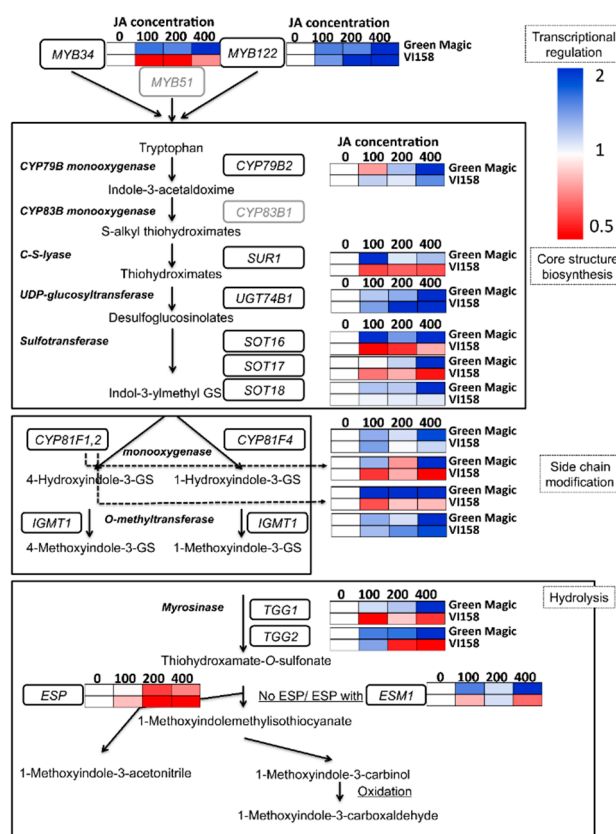

**Figure S2.** Glucosinolates related genes expression 3 days after JA treatments. The color scale represents  $\log_2$ -transformed, actin normalized (*BoACT1*) gene expression ratios comparing transcript abundance of JA treated plants following 100, 200, and 400  $\mu\text{M}$  JA treatments to control, uninfested plants.

**Table S1.** Primer set information for gene expression measurement.

| Gene Class                                 | Gene Name | Gene Model | Type                 | Sequence                  |
|--------------------------------------------|-----------|------------|----------------------|---------------------------|
| Indole-Associated<br>Transcription Factors | MYB34     | Bol017062  | Forward              | TGAAGGTGGATGGCGTACTCT     |
|                                            |           |            | Reverse              | GCCCATCTCAGCCTACAACTCT    |
|                                            | MYB122    | Bol026204  | Forward              | CTTCCCGACAAAGCTGGACT      |
|                                            |           |            | Reverse              | TTGGCTAAACTCACCACGCT      |
| Core Structure<br>Biosynthesis Genes       | CYP79B2   | Bol032767  | Forward              | GATGAAATTAACCCACCATTAAGGA |
|                                            |           |            | Reverse              | GCCATGGCCCATTCGA          |
|                                            | SUR1      | Bol029775  | Forward              | GCTCCCACGTCCCGTTT         |
|                                            |           |            | Reverse              | GCGAACCTCGAGACCACTGT      |
|                                            | UGT74B1   | Bol005786  | Forward              | CGACGGCCACGACTTCAT        |
|                                            |           |            | Reverse              | GCTTGAAGGATTCGGAGTATGC    |
|                                            | SOT16     | Bol039395  | Forward              | TTCGACGACGCCACGAA         |
|                                            |           |            | Reverse              | CTCCACGTAAGGCACGAACTC     |
| SOT17                                      | Bol030757 | Forward    | CCATCGCCACGCTTCCT    |                           |
|                                            |           | Reverse    | CCGCCGTACTCGACGAAA   |                           |
| SOT18                                      | Bol026202 | Forward    | CCCAAAGACAGGCACCACTT |                           |
|                                            |           | Reverse    | GGAATCGTCGAAGCGAGATC |                           |
| Indole Side-Chain<br>Modification Genes    | CYP81F1   | Bol028913  | Forward              | CCGAGACATTCCGGCTATTC      |
|                                            |           |            | Reverse              | CATGTCCTCCGTCGGTCTTC      |
|                                            | CYP81F2   | Bol026044  | Forward              | TCTCCCACCAGGACCAACTC      |
|                                            |           |            | Reverse              | GGTGGACCGGCGGTTT          |
| IGMT1                                      | Bol007030 | Forward    | GGACCGGATGCTTCGTCTAC |                           |
|                                            |           | Reverse    | TCTCTCGCCCTTTCCAACTT |                           |
| CYP81F4                                    | Bol032712 | Forward    | TCCCTCTCCGCTCACTCT   |                           |
|                                            |           | Reverse    | GGTGGACGGGAGGTTAATGA |                           |
| Myrosinases                                | TGG1      | Bol017328  | Forward              | GTGCCTACGAGAGGCTATTCAAC   |
|                                            |           |            | Reverse              | GCCGTAACATCTTTCATCAACCT   |
|                                            | TGG2      | Bol028319  | Forward              | CGAACTCAACGCTACTGGTTACA   |
|                                            |           |            | Reverse              | TACTCCCCTGCTCCTCTTCC      |
| Specifier Proteins                         | ESP       | Bol006378  | Forward              | CTACACGACTGCTACCGTCTATGG  |
|                                            |           |            | Reverse              | GGTTGTGGTGGGACGTTTT       |
|                                            | ESM1      | Bol005067  | Forward              | TCCGATGTTGAACCAGTTTGC     |
|                                            |           |            | Reverse              | CGAAGGATGGCGTTGTAGAAA     |
| Endogenous Control Gene                    | Actin     | Bol030974  | Forward              | TCCCGAGAGGAAGTACAGTGTCT   |
|                                            |           |            | Reverse              | GAGATCCACATCTGCTGGAATG    |

**Table S2.** Correlations between glucosinolates, their hydrolysis products, and cabbage looper growth parameters. Pearson correlation coefficients were calculated based on mean values of variables for the two different broccoli cultivars.

| Variable                      | By Variable                      | Correlation | p-Value |
|-------------------------------|----------------------------------|-------------|---------|
| Caterpillar weight at 5th day | Indole-3-carboxaldehyde          | -0.722      | 0.043   |
| Caterpillar weight at 5th day | Protein concentration            | 0.840       | 0.009   |
| % survival                    | 1-Methoxyindole-3-carboxaldehyde | -0.728      | 0.041   |
| % survival                    | Total indole GS                  | -0.810      | 0.015   |
| % survival                    | Caterpillar weight at 5th day    | 0.760       | 0.029   |
| % survival                    | Number of days to pupation       | -0.819      | 0.013   |
| Pupal weight                  | Protein concentration            | 0.917       | 0.001   |
| Pupal weight                  | Caterpillar weight at 5th day    | 0.806       | 0.016   |
| Number of days to pupation    | 1-Methoxyindole-3-carboxaldehyde | 0.929       | <0.0001 |
| Number of days to pupation    | 1-Methoxyindole-3-carbinol       | 0.927       | <0.0001 |
| Number of days to pupation    | Neoscorbigen                     | 0.860       | 0.006   |
| Number of days to pupation    | Total indole GS                  | 0.977       | <0.0001 |
| Number of days to pupation    | Total GS                         | 0.913       | 0.002   |
